# Supplementary material
Source: PubMed Central journal article supplement (PMC1867354)
Supplement: plntcell_tpc.106.048884_1.pdf [file plntcell_tpc.106.048884_1.pdf]

● N-myristoylation  
● ▼ palmitoylation

|          |   |                                                                      |    |
|----------|---|----------------------------------------------------------------------|----|
| St CDPK4 | 1 | MGNTCRG--SIGGKTFQGY-----T-QEDSSCSTN-----HNPSSGNSYSSSDNFSPTS-----NA   | 49 |
| St CDPK5 | 1 | MGNACRG--SFGGKTFQGY-----P-QPDDHSESNS-----NPKHN-----SDSPFK-----40     | 40 |
| Cm CPK2  | 1 | MGNTCRG--SFKGNIFQGY-----YSQPEESSTPNF-----KRNING-----SSDHSPTSINTNLLIS | 50 |
| Ca CDPK3 | 1 | MGNACRG--SFRKTFQGS-----YQNHSTSKH-----SKVEE-----EQQDPAP-----LV        | 42 |
| At CPK6  | 1 | MGNACRG--SFKDKIYECN-----HSRPEENSKS-----TTTTV-----SSVHSP-----TD       | 41 |
| Nt CDPK2 | 1 | MGNTCVGPSISKNGLEQSVSAAMWRTRADDSGSTTNGDSARGETTESGKDPDLVVQNKPEQITMPKSE | 70 |

Variable domain ← → Kinase domain

|          |    |                                                                          |     |
|----------|----|--------------------------------------------------------------------------|-----|
| St CDPK4 | 50 | QONSNHKKEHSLSLVSPRKASMNRSGSN--QAYVVMGHMTPNIRDLYTLGRKLGQGGFGTTYLCTENSIG   | 117 |
| St CDPK5 | 40 | -----KEQQPLVDMNRSTN--QSYVVLGHKTPNIRDLYTLGRKLGQGGFGTTYLCTELSSIG           | 95  |
| Cm CPK2  | 51 | QAFAEENKTKSKDNDCKDYTMKSAEN--QAYVVLGHKTPNIRDLYTLGRKLGQGGFGTTYLCTEIMIG     | 118 |
| Ca CDPK3 | 43 | VKD-----HSTSTKKNMNRSSAN--QSCCVLGHKTPNIRDLYTLGRKLGQGGFGTTYLCTELSPIC       | 100 |
| At CPK6  | 42 | QDFSQN--NPNALVIPVKEPIIMRRNVDN--QSYVVLGHKTPNIRDLYTLGRKLGQGGFGTTYLCTDIAPIC | 108 |
| Nt CDPK2 | 71 | QKEEPAKKEEGPVKPKKPEEMKRVGSAGLRDTSVLQKKTGNLKEFFSTGKKGQGGFGTTFKQVQKATIG    | 140 |

★ ATP-binding site

|          |     |                                                                       |     |
|----------|-----|-----------------------------------------------------------------------|-----|
| St CDPK4 | 118 | AEYACKSIKRRKLSKEDVEDVRREIQIMHHLGAGHKNIVTKGAYEDPLYVHVMEICSGGELFDRIIQR  | 187 |
| St CDPK5 | 96  | IDYACKSIKRRKLSKEDVEDVRREIQIMHHLGAGHKNIVTKGAYEDPLYVHVMEICSGGELFDRIIQR  | 165 |
| Cm CPK2  | 119 | IEYACKSIKRRKLSKEDVEDVRREIQIMHHLGAGHKNIVTKGAYEDPLYVHVMEICSGGELFDRIIQR  | 188 |
| Ca CDPK3 | 101 | IDYACKSIKRRKLSKEDVEDVRREIQIMHHLGAGHKNIVTKGAYEDPLYVHVMEICSGGELFDRIIQR  | 170 |
| At CPK6  | 109 | VDYACKSIKRRKLSKEDVEDVRREIQIMHHLGAGHKNIVTKGAYEDPLYVHVMEICAGGELFDRIIQR  | 178 |
| Nt CDPK2 | 141 | KEYACKSIKRRKLSKEDVEDVRREIQIMHHLGAGHKNIVTKGAYEDVAVHVHVMEICAGGELFDRIIQR | 210 |

|          |     |                                                                        |     |
|----------|-----|------------------------------------------------------------------------|-----|
| St CDPK4 | 188 | GHYSERKAAELTKIIVGVVEACHSLGVMHRDLKPENFLVNKDDDFSLKAIIDFGLSVFFKPGQIFTDVVG | 257 |
| St CDPK5 | 166 | GHYTERKAAELTKIIVGVVEACHSLGVMHRDLKPENFLVNKDDDFSLKAIIDFGLSVFFKPGQIFTDVVG | 235 |
| Cm CPK2  | 189 | GHYSERKAAELTKIIVGVVEACHSLGVMHRDLKPENFLVNKDDDFSLKAIIDFGLSVFFKPGQIFTDVVG | 258 |
| Ca CDPK3 | 171 | GHYTERKAAELTKIIVGVVEACHSLGVMHRDLKPENFLVNKDDDFSLKAIIDFGLSVFFKPGQIFTDVVG | 237 |
| At CPK6  | 179 | GHYSERKAAELTKIIVGVVEACHSLGVMHRDLKPENFLVNKDDDFSLKAIIDFGLSVFFKPGQIFTDVVG | 248 |
| Nt CDPK2 | 211 | GHYTERKAAELTKIIVGVVEACHSLGVMHRDLKPENFLVNKDDDFSLKAIIDFGLSVFFKPGQIFTDVVG | 280 |

|          |     |                                                                       |     |
|----------|-----|-----------------------------------------------------------------------|-----|
| St CDPK4 | 258 | SPYYVAPEVLLKHYGPEADVNTAGVILYILLSGVPPFWAETQQGIFDAVLKGHIDFSDPWPLISESAKD | 327 |
| St CDPK5 | 236 | SPYYVAPEVLLKHYGPEADVNTAGVILYILLSGVPPFWAETQQGIFDAVLKGHIDFSDPWPLISESAKD | 305 |
| Cm CPK2  | 259 | SPYYVAPEVLLKHYGPEADVNTAGVILYILLSGVPPFWAETQQGIFDAVLKGHIDFSDPWPLISESAKD | 328 |
| Ca CDPK3 | 238 | SPYYVAPEVLLKHYGPEADVNTAGVILYILLSGVPPFWAETQQGIFDAVLKGHIDFSDPWPLISESAKD | 307 |
| At CPK6  | 249 | SPYYVAPEVLLKHYGPEADVNTAGVILYILLSGVPPFWAETQQGIFDAVLKGHIDFSDPWPLISESAKD | 318 |
| Nt CDPK2 | 281 | SPYYVAPEVLLKHYGPEADVNTAGVILYILLSGVPPFWAETQQGIFDAVLKGHIDFSDPWPLISESAKD | 350 |

← → Junction domain ← → Calmodulin-like domain

|          |     |                                                                        |     |
|----------|-----|------------------------------------------------------------------------|-----|
| St CDPK4 | 328 | LIRKMLCMQPSERLTAHEVLCHPWICENGVPADRALDPAVLSRLKQFSAMNKLKMMALRVIAESLSEEEI | 397 |
| St CDPK5 | 306 | LIRKMLCMRPSERLTAHEVLCHPWICENGVPADRALDPAVLSRLKQFSAMNKLKMMALRVIAESLSEEEI | 375 |
| Cm CPK2  | 329 | LIRKMLCSRPSERLTAHEVLCHPWICENGVPADRALDPAVLSRLKQFSAMNKLKMMALRVIAESLSEEEI | 398 |
| Ca CDPK3 | 308 | LIRKMLCMRPSERLTAHEVLCHPWICENGVPADRALDPAVLSRLKQFSAMNKLKMMALRVIAESLSEEEI | 377 |
| At CPK6  | 319 | LIRKMLCSSPSERLTAHEVLCHPWICENGVPADRALDPAVLSRLKQFSAMNKLKMMALRVIAESLSEEEI | 388 |
| Nt CDPK2 | 351 | LVRRMLVRDEKRRLTAHEVLCHRWVQVDGVAPDKPLDSAVLSRMKQFSAMNKLKMMALRVIAESLSEEEI | 420 |

|          |     |                                                                       |     |
|----------|-----|-----------------------------------------------------------------------|-----|
| St CDPK4 | 398 | AGLREMFKAMDTSAGAITFDELKAGLRKRVGSLKDTIEIRELMDAADVNSGTYDGEFFIAATVHLNKLE | 467 |
| St CDPK5 | 376 | AGLREMFKAMDTSAGAITFDELKAGLRKRVGSLKDTIEIRELMDAADVNSGTYDGEFFIAATVHLNKLE | 445 |
| Cm CPK2  | 399 | AGLREMFKAMDTSAGAITFDELKAGLRKRVGSLKDTIEIRELMDAADVNSGTYDGEFFIAATVHLNKLE | 468 |
| Ca CDPK3 | 378 | AGLREMFKAMDTSAGAITFDELKAGLRKRVGSLKDTIEIRELMDAADVNSGTYDGEFFIAATVHLNKLE | 447 |
| At CPK6  | 389 | AGLREMFKAMDTSAGAITFDELKAGLRKRVGSLKDTIEIRELMDAADVNSGTYDGEFFIAATVHLNKLE | 458 |
| Nt CDPK2 | 421 | AGLREMFRIIDTNSGQITFDELKAGLRKRVGSLKDTIEIRELMDAADVNSGTYDGEFFIAATVHLNKLE | 490 |

|          |     |                                                                         |     |
|----------|-----|-------------------------------------------------------------------------|-----|
| St CDPK4 | 468 | REEHLMAAFQYFDKDGSGYITVDELOQACAEHNMIDTVYFEDIIREVDQDNDGRIDYGEFVAMMOKGNPFI | 537 |
| St CDPK5 | 446 | REEHLMAAFQYFDKDGSGYITVDELOQACAEHNMIDTVYFEDIIREVDQDNDGRIDYGEFVAMMOKGNPFI | 515 |
| Cm CPK2  | 469 | REEHLMAAFQYFDKDGSGYITVDELOQACAEHNMIDTVYFEDIIREVDQDNDGRIDYGEFVAMMOKGNPFI | 538 |
| Ca CDPK3 | 448 | REEHLMAAFQYFDKDGSGYITVDELOQACAEHNMIDTVYFEDIIREVDQDNDGRIDYGEFVAMMOKGNPFI | 517 |
| At CPK6  | 459 | REEHLMAAFQYFDKDGSGYITVDELOQACAEHNMIDTVYFEDIIREVDQDNDGRIDYGEFVAMMOKGNPFI | 528 |
| Nt CDPK2 | 491 | REDHLMAAFQYFDKDGSGYITVDELOQACAEHNMIDTVYFEDIIREVDQDNDGRIDYGEFVAMMOKGNPFI | 560 |

|          |     |                        |     |
|----------|-----|------------------------|-----|
| St CDPK4 | 538 | G--RRTMRNSLNFSMRDAPGAQ | 557 |
| St CDPK5 | 516 | G--RRTMRNSLNFSMRDAPGAH | 535 |
| Cm CPK2  | 539 | G--RRTMRNSLNFSMRDAPGAL | 558 |
| Ca CDPK3 | 518 | G--RRTMRNSLNFSMRDAPGAH | 537 |
| At CPK6  | 529 | G--RRTMRNSLNFSMRDAPV   | 544 |
| Nt CDPK2 | 561 | GGGKGLHESFSTGFRALRL    | 581 |

Supplemental Figure 1. Alignment of the Predicted Amino Acid Sequences of St CDPK4, St CDPK5, Cm CPK2, Ca CDPK3, At CPK6 and Nt CDPK2.

Amino acids that are conserved are boxed in black. Multiple alignment of the protein sequence was made using the CLISTAL W program (Thompson et al., 1994).
