# Supplementary material
Source: PubMed Central journal article supplement (PMC1867354)
Supplement: plntcell_tpc.106.048884_2.pdf [file plntcell_tpc.106.048884_2.pdf]

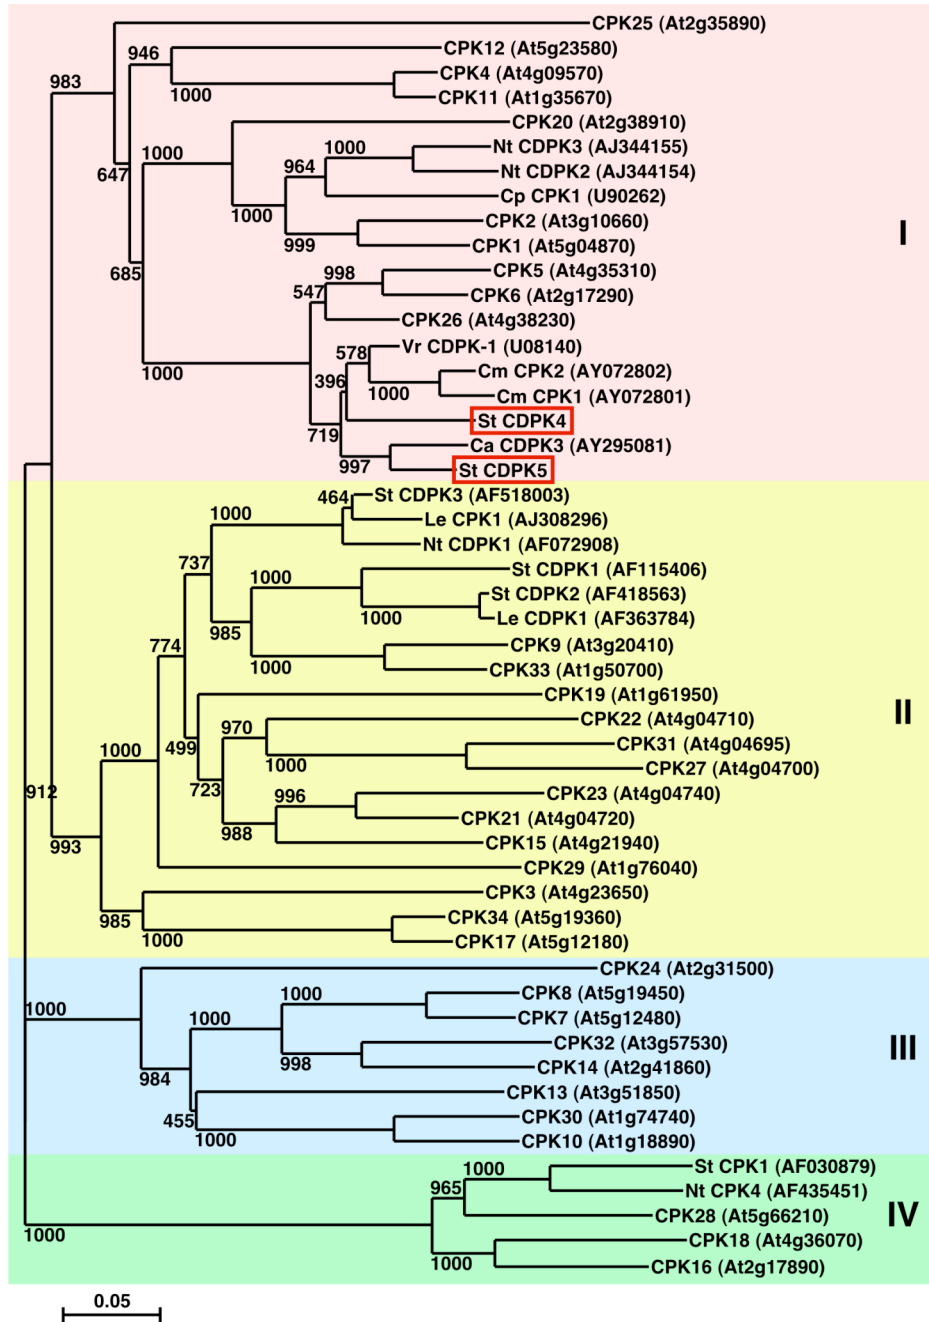

**Supplemental Figure 2.** Phylogenetic Tree of Various Plant CDPKs.

An unrooted tree was constructed using the neighbor-joining method (Saitou and Nei, 1987). The length of the horizontal lines connecting the sequences is proportional to the estimated genetic distance between these sequences. The number above or below each horizontal line is the frequency with which a given branch appeared in 1000 bootstrap replications. St CDPK4 and St CDPK5 are marked with red boxes.
