# Supplementary material
Source: PubMed Central journal article supplement (PMC1867354)
Supplement: plntcell_tpc.106.048884_3.pdf [file plntcell_tpc.106.048884_3.pdf]

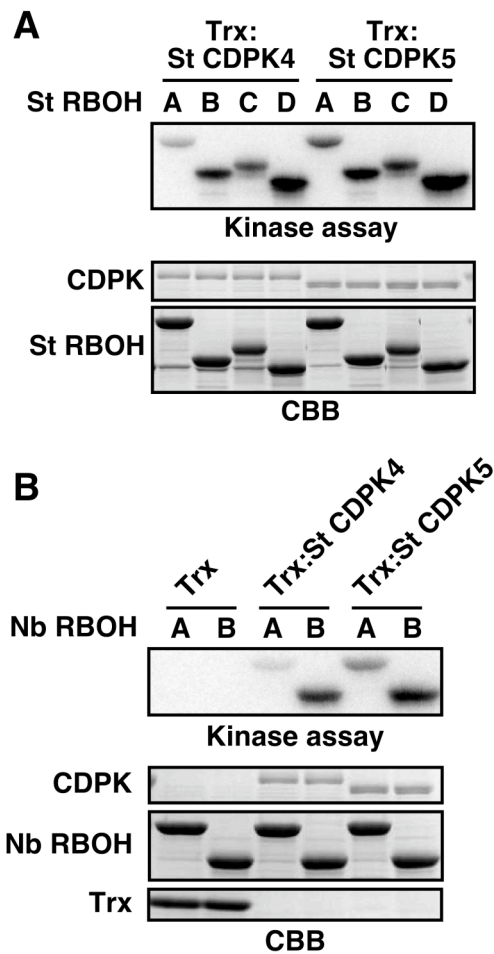

**Supplemental Figure 3.** Phosphorylation of N-Terminal Proteins of St RBOHs and Nb RBOHs by Recombinant St CDPK4 and St CDPK5 Proteins in vitro.

**(A)** Phosphorylation of N-Terminal Proteins of St RBOHA, St RBOHB, St RBOHC and St RBOHD. Purified N-terminal peptides of St RBOHA<sub>1-395</sub>, St RBOHB<sub>1-318</sub>, St RBOHC<sub>1-365</sub> and St RBOHD<sub>1-314</sub> were used as substrates for Trx-fused St CDPK4 and St CDPK5. Phosphorylation of St RBOHA to D was detected by X-ray film (upper panel). Protein loads were monitored by CBB-staining (lower panels).

**(B)** Phosphorylation of N-Terminal Proteins of Nb RBOHA and Nb RBOHB. Purified N-terminal peptides of Nb RBOHA<sub>1-394</sub> and Nb RBOHB<sub>1-366</sub> were used as substrates for Trx-fused St CDPK4 and St CDPK5. Phosphorylation was detected by X-ray film (upper panel). Protein loads were monitored by CBB-staining (lower panels).
