# Supplementary material
Source: PubMed Central journal article supplement (PMC1867354)
Supplement: plntcell_tpc.106.048884_4.pdf [file plntcell_tpc.106.048884_4.pdf]

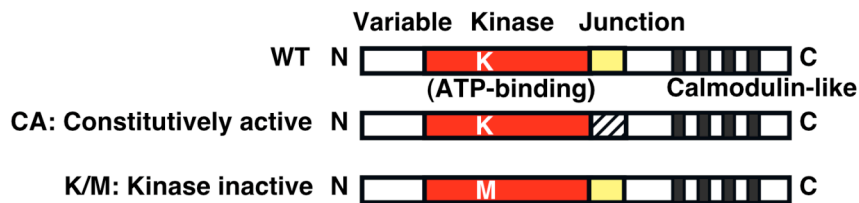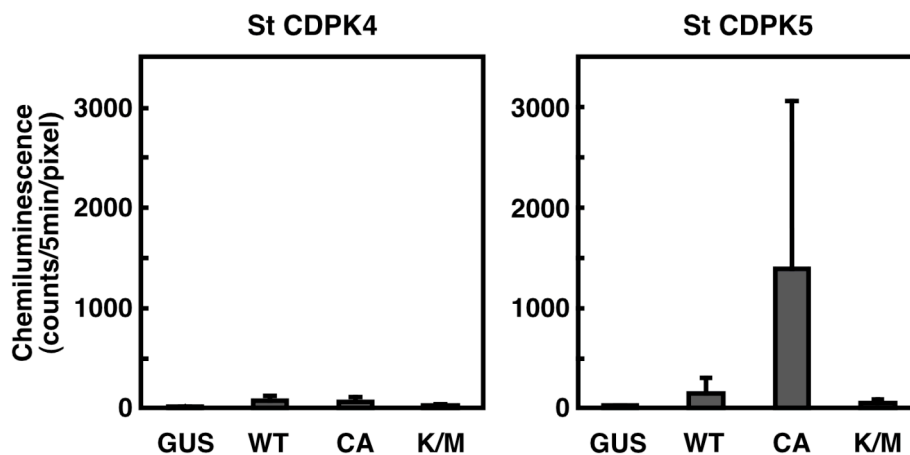

**Supplemental Figure 4.** ROS Production Mediated by St CDPK4 and St CDPK5 Full Length Variants in *N. benthamiana* Leaves.

Diagrams indicate schematic structure of St CDPK4 and St CDPK5. Diagonal box indicates a six-residue substitution in the J domain. ‘K’ indicates Lys residue for ATP-binding in K domain and ‘M’ indicates amino acid substitution in Lys to Met. WT, wild-type form; CA, constitutively active form; K/M, kinase-inactive form.
