# Supplementary material
Source: PubMed Central journal article supplement (PMC1867354)
Supplement: plntcell_tpc.106.048884_5.pdf [file plntcell_tpc.106.048884_5.pdf]

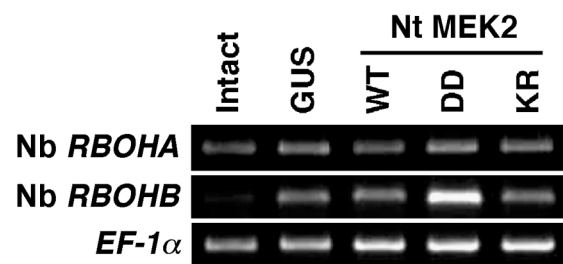

**Supplemental Figure 5.** Induction of Nb *RBOHB* Expression by *Agrobacterium* Infection and *Agrobacterium*-Mediated Nt *MEK2<sup>DD</sup>* Expression.

Leaves were infiltrated with *Agrobacterium* harboring *GUS*, Nt *MEK2<sup>WT</sup>*, Nt *MEK2<sup>DD</sup>* or Nt *MEK2<sup>KR</sup>*. Total RNA was prepared 24 h after the infiltration. Expression of Nb *RBOHA*, Nb *RBOHB* and *EF-1α* was monitored by RT-PCR analysis.
