# Supplementary material
Source: PubMed Central journal article supplement (PMC1867354)
Supplement: plntcell_tpc.106.048884_6.pdf [file plntcell_tpc.106.048884_6.pdf]

|          |      |                           |                         |                             |                        |                    |               |     |
|----------|------|---------------------------|-------------------------|-----------------------------|------------------------|--------------------|---------------|-----|
| St CDPK4 | 1    | ATGGGCAACaCATGCCGTGGATCTA | TGGAGGCAAAA             | CTTTTCAGGGT                 | TACaCTCAGCCT           | aAGATAGTT          | 70            |     |
| St CDPK5 | 1    | ATGGGCAACgCATGCCGTGGATCTT | CGGAGGCAAAA             | CTTTTCAGGGC                 | TACCCTCAGCCT           | aAGAT----          | 66            |     |
| St CDPK4 | 71   | CCTGCTCCACCAATCA          | TAAcCCCTTCTCCGGCAATTC   | TTATTCCTTCTTGACAAAT         | TTTTCTCCCA             | CCCAg              | 140           |     |
| St CDPK5 | 66   | -----CATTCA               | GAAATCC-----AATTC       | CAATCCAAAC                  | ---ATAAT               | CCGATCCCCAA        | 113           |     |
| St CDPK4 | 141  | TAAcGCTCAaCAGAA           | TAGCAATCACA             | GAAGGAGCATTCTT              | TGTCTCTTGTTAGT         | CCCCAGAAAAGCTAGC   | 210           |     |
| St CDPK5 | 144  | -----ACCA                 | AAAAAGCAACA             | -----CCCT                   | CGGTCA                 | -----              | 144           |     |
| St CDPK4 | 211  | ATGAATCGTTcCGGG           | AGTAACTAGGCTTATTAT      | GTAAAGGGTCATATGACCCC        | GAATATTCCGCATCTTT      |                    | 280           |     |
| St CDPK5 | 145  | ATGAATCGTAcAAGC           | ACTAACcCAGTCTATTAC      | GTCCCGGTCATAAGACCCC         | TAAcATTCCGCATCTAT      |                    | 214           |     |
| St CDPK4 | 281  | ATACTTcGGGA               | AGAAATAGGACA            | AGGGCAGTTGGCAC              | ACTTATTTATGCACA        | GAGAAATCTACCGG     | 350           |     |
| St CDPK5 | 215  | ACACCCcCGGCC              | CAAACTAGGACA            | AGGGTCAGTTGGCAC             | ACTTATTTATGCACC        | GAAATGTCTCCGG      | 284           |     |
| St CDPK4 | 351  | TGCTcGAGTATGCCT           | TAAATCAATCTCA           | AGAGGAAAGTGA                | TCTCAGGAGGATGT         | CAAGATGTAGa        | 420           |     |
| St CDPK5 | 285  | TATCGAcTACGCCT            | TAAATCTATTGC            | CAAGAGAAA                   | CTCATCTCAAGGAGGATGT    | GAAGATGTcAGG       | 354           |     |
| St CDPK4 | 421  | AGGAAATTCAGATA            | AATGCATCATTTGTCTGGT     | CATAGGAAATATGTTACT          | TATAAAGGGCCTTATGAGG    |                    | 490           |     |
| St CDPK5 | 355  | AGGAAATTCAGATA            | AATGCACCATTTGTCTGGT     | CACAAAA                     | CATCGTTTCATCA          | AGGGTcCTTATGAGG    | 424           |     |
| St CDPK4 | 491  | ATCCTTTATATGTT            | CATATTGTcATGGAGATA      | TGTA                        | GTGGCGGTGA             | GTTGTTGATCGGATCAT  | CAACG         | 560 |
| St CDPK5 | 425  | ATCGTTTGTATGTT            | CATATTGTcATGGAA         | CTTTCTGGTGGCGGTGA           | ATTGTTGACCG            | CATCATCAAA         | 494           |     |
| St CDPK4 | 561  | AGGACAT                   | TACACTGAGAGAA           | AGGCACTGAA                  | TTGACTAAAA             | TATTGTTGGGTTGTG    | GAGGCCGTGCAT  | 630 |
| St CDPK5 | 495  | AGGACAT                   | TACACTGAGAGAA           | AGGCTGCCGA                  | TTGACTAAAA             | TATTGTTGGGTTGTG    | GAGGCCATGCCAT | 564 |
| St CDPK4 | 631  | TCTCTTGGT                 | GTTATGCATAGAGATCTCAA    | ACCTGAGAATTTCTTGTGGT        | TAAaAGGATA             | AATGATTTCT         | 700           |     |
| St CDPK5 | 565  | TCACTTGGAG                | TATGCATAGAGATCTCAA      | ACCTGAGAATTTCTTGTGGT        | TAAcAAGGAT             | CATGATTTCT         | 634           |     |
| St CDPK4 | 701  | CTC                       | CAAGCCATTGATTTGGACTCTCT | CTTTTCTCTCAAGCCAGG          | CAAAATATTCACAGAT       | GTCTGTTGG          | 770           |     |
| St CDPK5 | 635  | CTC                       | CAAGCCATTGATTTGGACTCTCA | CTATTCTTCAAGCCAGG           | CAAAATATTCACAGAT       | GTCTGTTGG          | 704           |     |
| St CDPK4 | 771  | TAGTCCATAT                | TATGTTGGCTCCTGAGGTGC    | TTTTGAAGCATTATGGTCC         | TGAAGCTGATGTCTGGACAGCA |                    | 840           |     |
| St CDPK5 | 705  | GAGTCCATAcTACG            | TGCTCCTGAGGTGC          | TTTTGAAGCATTATGGTCC         | TGAAGCAGATGTCTGGACAGCA |                    | 774           |     |
| St CDPK4 | 841  | GGAGTCATAC                | CTACATACTGCTAAGTGG      | GTGCCACCATT                 | TGGGCTGAAACACAGCAGGGA  | AATATTTG           | 910           |     |
| St CDPK5 | 775  | GGCTCATACTCTA             | TATCTGCTAAGTGG          | GTGCCACCATT                 | TGGGCTGAAACACAGCAGGGA  | AATATTTG           | 844           |     |
| St CDPK4 | 911  | ACG                       | CAGTCTGAAAGGGCACATTG    | ATTTTACTCAGATCCTTGGCC       | ATTGATATCTGAGAGTGC     | AAAAGA             | 980           |     |
| St CDPK5 | 845  | ATG                       | CAGTCTGAAAGGGCACATTG    | ATTTTACTCAGATCCTTGGCC       | TTTATTATCTGAGAGTGC     | AAAAGA             | 914           |     |
| St CDPK4 | 981  | TCT                       | TATCCGGAAGATGTTCTGCATGC | AGCCCTCGAGCGGTTAACTGCTCAT   | GAAAGTATTCTGT          | CATCCT             | 1050          |     |
| St CDPK5 | 915  | TCT                       | CATCCGGAAGATGTTATGCATGC | GACCCCTCAGAGCGGTTAACTGCTCAT | GAAAGTATTATGT          | CATCCT             | 984           |     |
| St CDPK4 | 1051 | TGGATTTG                  | CGAAAATGGTGTGGTCTCTG    | ATAGAGCACTGGATCCTGCAGTACT   | TTCTCGCCTAA            | AAACAGT            | 1120          |     |
| St CDPK5 | 985  | TGGATTTG                  | TGAAAATGGTGTGGTCTCTG    | ATAGAGCACTTGATCCTGCAGTACT   | TTCTCGCCTCA            | AAACA              | 1054          |     |
| St CDPK4 | 1121 | TCTCTGC                   | TATGAACAAGTTAAAAA       | AGATGGCTTGGCGGGT            | GATTGCTGAAAGCTTGTCT    | GAAAGAACAGAT       | 1190          |     |
| St CDPK5 | 1055 | TTCTCTGC                  | ATGAACAAGTTAAAAA        | AGATGGCTTGGCGGGT            | GATTGCTGAAAGCTTGTCT    | GAAAGAACAGAT       | 1124          |     |
| Nb CDPK5 | 1    | -----                     | -----                   | -----                       | GTGATCGCTGAAAGCTTGTCT  | CGAGGAGGAGAT       | 32            |     |
| St CDPK4 | 1191 | TGC                       | GGTCTGAGAGAGATGTTTAA    | AGGCCATGGATACTGACAGT        | AGTGGTGAATACATTT       | CATGAACTA          | 1260          |     |
| St CDPK5 | 1125 | TGC                       | CGGTCTTAAAGGAGATGTTTAA  | AGGCCATGGATACTGATAAC        | AGTGGTGAATACATTT       | CATGAACTA          | 1194          |     |
| Nb CDPK5 | 33   |                           |                         |                             |                        |                    | 102           |     |
| St CDPK4 | 1261 | AAAGC                     | AGGCTTTGAGAAAA          | TATGGCTCTACCTTAA            | AGGATACGGAGATACGGGA    | ACTTATGGATGCGGCTG  | 1330          |     |
| St CDPK5 | 1195 | AAAGC                     | TGGTTGAGAAAA            | TATGGCTCTACCTTAA            | AGGATATAGAGATACGGGA    | ACTTATGGATGCGGCTG  | 1264          |     |
| Nb CDPK5 | 103  | AAAGC                     | TGGTTGAGAAAA            | TATGGCTCTACCTTAA            | AGGATATAGAGATACGGGA    | ACTTATGGATGCGGCTG  | 172           |     |
| St CDPK4 | 1331 | ATG                       | TGGACAATAGTGGAACTAT     | TGACTATGGAGAATTCAT          | TGCCGCAACTGTTCA        | TCTAAATAAATGGAA    | 1400          |     |
| St CDPK5 | 1265 | ATG                       | TGGACAATAGTGGAACTAT     | TGACTATGGAGAATTCAT          | TAGCAGCAACTATTCACCT    | TAAACAATGGAA       | 1334          |     |
| Nb CDPK5 | 173  | ATG                       | TGGACAATAGTGGAACTAT     | TGACTATGGAGAATTCAT          | TAGCAGCAACTATTCACCT    | TAAACAATGGAA       | 242           |     |
| St CDPK4 | 1401 | GCG                       | CGAGGAACATCTCATGGC      | CGCATTTCAAATTTTTGACA        | AGGATGGAAGTGGTTA       | CATACCGGTTGAT      | 1470          |     |
| St CDPK5 | 1335 | CCG                       | CGAGGAACATCTCATGGC      | CAGCATTTCAGTATTTT           | GACAAGGATGGAAGTGGTTA   | TATTACTGTAGAT      | 1404          |     |
| Nb CDPK5 | 243  | CCG                       | CGAAGAACATCTCATGGC      | CAGCATTTCAGTATTTT           | GACAAGGATGGAAGTGGTTA   | TATTACTGTAGAT      | 312           |     |
| St CDPK4 | 1471 | GAG                       | CTCCAAcAGCTTGTAT        | AGAGCATAACATGACAGATGT       | TACTTTGAGGATATTTATA    | GAGAAAGTcG         | 1540          |     |
| St CDPK5 | 1405 | GAG                       | CTCCAAcAGCTTGTAT        | AGAGCATAACATGACAGATGT       | TACTTTGAGGATATTTATA    | GAGAAAGTcG         | 1474          |     |
| Nb CDPK5 | 313  | GAG                       | CTCCAAcAGCTTGTAT        | AGAGCATAACATGACAGATGT       | TACTTTGAGGATATTTATA    | GAGAAAGTcG         | 382           |     |
| St CDPK4 | 1541 | ATC                       | AGGATAATGATGGACCA       | AATGATATGGAGAATTTGTTGCT     | TATGATGC               | AAAAAGGAAATCCATGTA | 1610          |     |
| St CDPK5 | 1475 | ATC                       | AGGATAATGATGGACCA       | AATGATATGGAGAATTTGTTGCT     | TATGATGC               | AAAAAGGAAATCCATGTA | 1544          |     |
| Nb CDPK5 | 383  | ATC                       | AGGATAATGATGGACCA       | AATGATATGGAGAATTTGTTGCT     | TATGATGC               | AAAAAGGAAATCCATGTA | 450           |     |
| St CDPK4 | 1611 | AGG                       | cAGACGAACAATGCG         | AAATAGTCTGAATTTc            | AGCATGAGAGATGC         | CCGGAGCTCACTAG     | 1674          |     |
| St CDPK5 | 1545 | AGG                       | aAGACGAACgATGCG         | AAATAGTCTGAATTTc            | AGCATGAGAGATGC         | CCGGAGCTCACTAG     | 1608          |     |

Supplemental Figure 6. Alignment of the Nucleotide Sequences of St CDPK4, St CDPK5 and Nb CDPK5.

Conserved nucleotides are boxed in black. Partial sequence of Nb CDPK5 cDNA used for VIGS was shown. Multiple alignment of the nucleotide sequence was made using the CLISTAL W program (Thompson et al., 1994).
